# Supplementary material for: Noncanonical activation of protease-activated receptor 1 induces autophagy in mammalian breast cancer cells
Source: Research Square preprint supplement (doi:10.21203/rs.3.rs-6938991/v1), 2025-06-30
Supplement: Supplementary file 1 [file fb84e5fc12e8a90b13c92ca0.pdf]

## **Supplementary data**

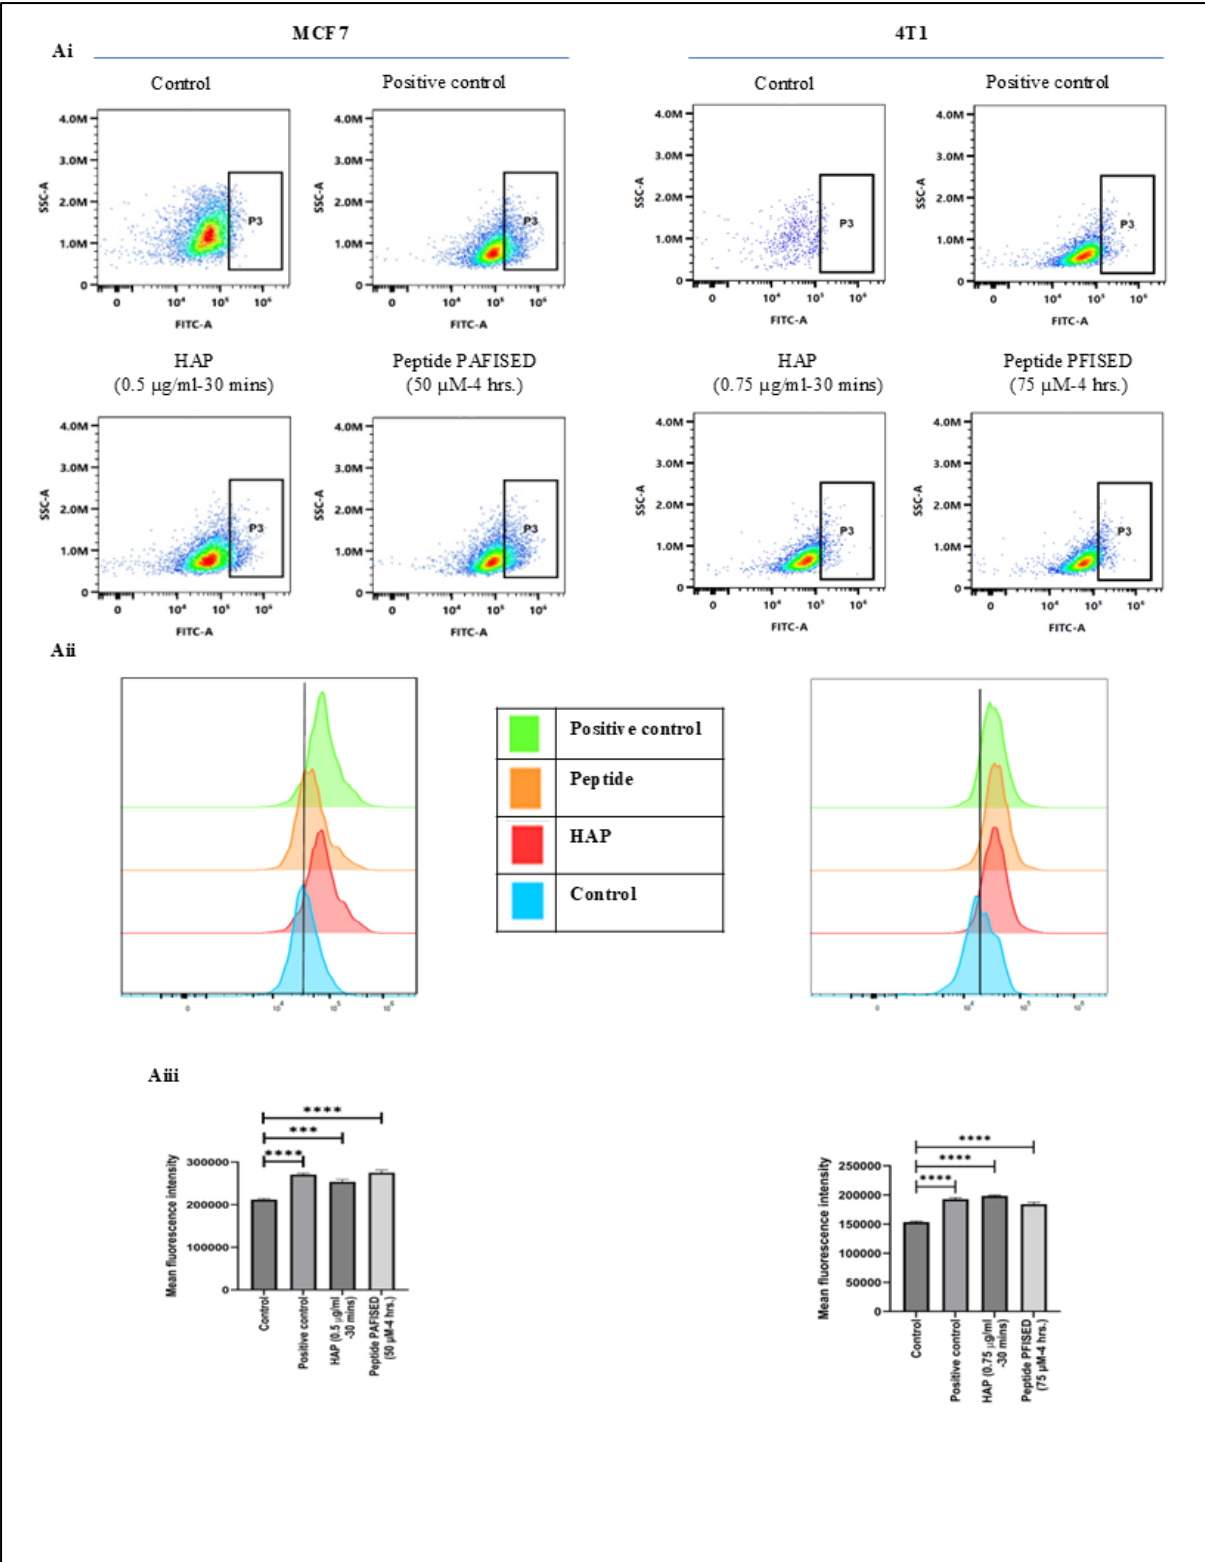

**Figure S1: Autophagy assay analysis. (Ai)** Representative flowcytometric images of MCF7 and 4T1 cells treated with HAP (0.5 and 0.75  $\mu\text{g/ml}$  for MCF-7 and 4T1 respectively) for 30 minutes and with the peptides (50  $\mu\text{M}$  of PAFISED for MCF-7 and 75  $\mu\text{M}$  of PFISED for 4T1) for 4 hours and stained using the Autophagy assay kit (ab139484) of Abcam. Cells treated with rapamycin and chloroquine simultaneously for 24 hours was kept as positive control. Fluorescence was measured under FITC channel of a flowcytometer. All the representative histograms in each cell type are arranged vertically for a better understanding of comparative analysis. **(Aii)** Graphical analysis of Mean fluorescence intensity of FITC.

## PFISED

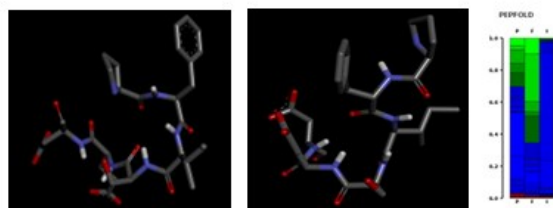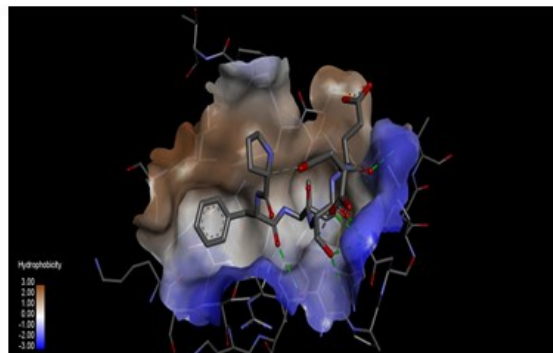

**CONTACT MAP OF THE INTERFACE BETWEEN RECEPTOR AND PEPTIDE**

| Peptide Residue Index | Receptor Residue Index | Contact |
|-----------------------|------------------------|---------|
| ASP C 7               | LEU A 11               | Yes     |
| GLU C 6               | LEU A 11               | Yes     |
| SER C 5               | LEU A 11               | Yes     |
| ILE C 4               | LEU A 11               | Yes     |
| PHE C 3               | LEU A 11               | Yes     |
| ALA C 2               | LEU A 11               | Yes     |
| PRO C 1               | LEU A 11               | Yes     |

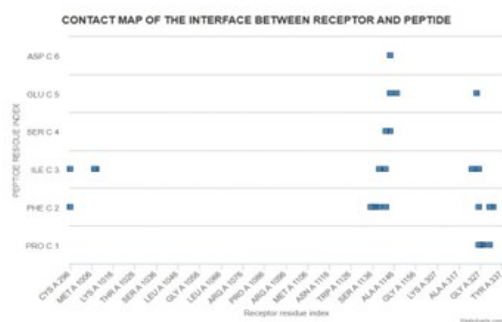

CLUSTERS COMPOSITION

| Model index | Trajectory Index |
|-------------|------------------|
| 100         | 5                |
| 600         | 9                |
| 900 - 1000  | 9                |

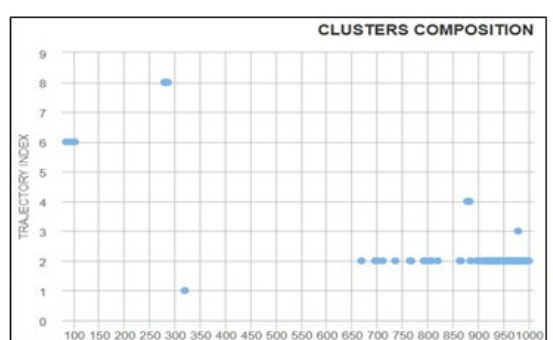

**Figure S2: Peptide Structure prediction and Blind Docking Analysis of the peptides PAFISED (Left Side) & PFISED (Right side).** (A) Top 2 predicted peptide structure by PEP-FOLD4 with local structure prediction profile which shows the probabilities of structural alphabet. (B) hydrophobicity representation of peptide with PAR1 by CABS dock. (C) Contact Map of receptor residues and Peptide of top docked pose. (D) Cluster composition vs trajectory affiliations of top docked pose.

A

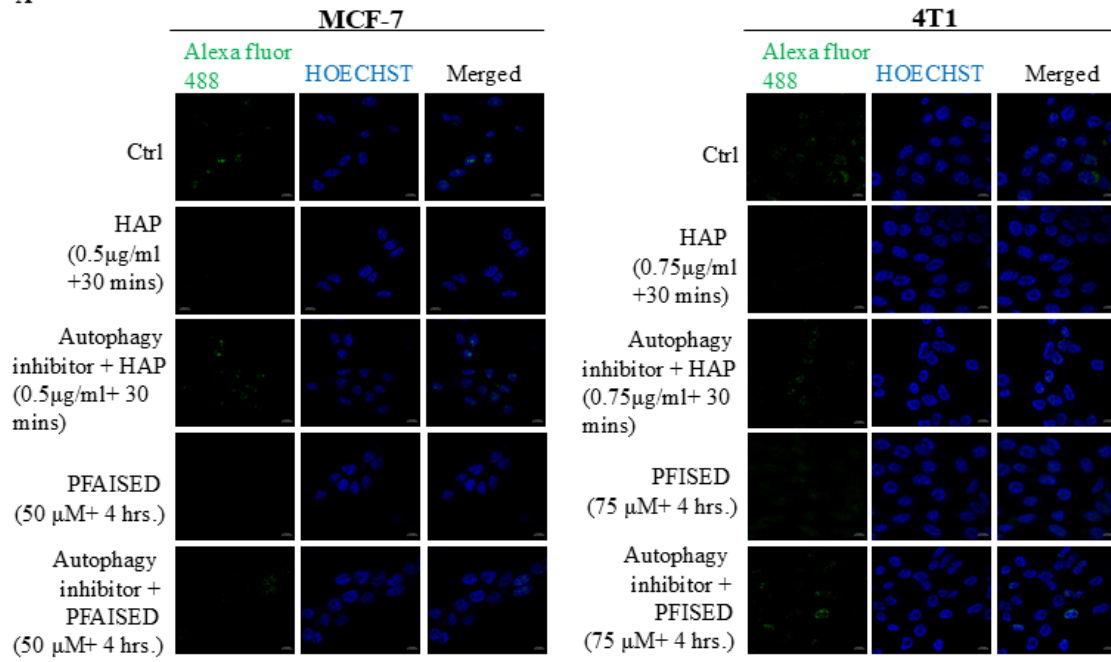

B

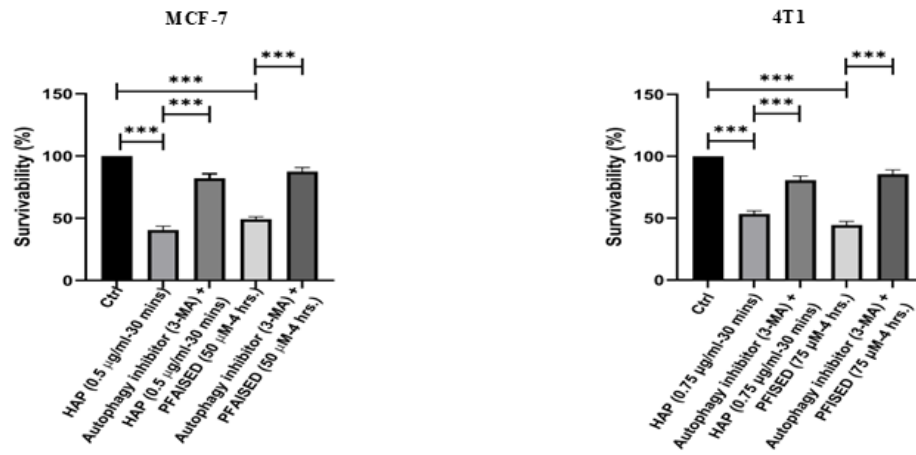

C

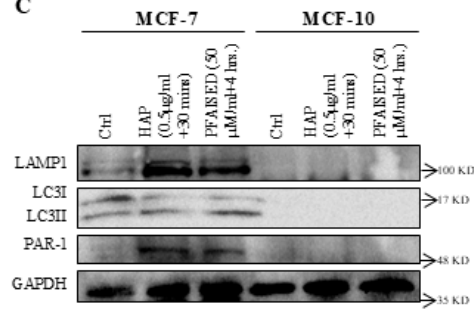

**Figure S3: Effect of HAP and peptide induced autophagy on the proliferation and viability of cancer cells:** (A) Representative immunofluorescence images of MCF-7 and 4T1 cells treated with HAP (0.5 and 0.75  $\mu\text{g/ml}$  for MCF-7 and 4T1 respectively) for 30 minutes and with the peptides (50  $\mu\text{M}$  of PAFISED for MCF-7 and 75  $\mu\text{M}$  of PFISED for 4T1) for 4 hours with or without pre-treatment of autophagy inhibitor 3-MA and analyzed for proliferation using anti-Ki-67 antibody and AlexaFluor 488 tagged corresponding secondary antibody. Nuclei were stained with Hoechst 33342. Images were captured using a confocal microscope. (B) Survivability analysis of MCF-7 and 4T1 cells treated with HAP (0.5 and 0.75  $\mu\text{g/ml}$  for MCF-7 and 4T1 respectively) for 30 minutes and with the peptides (50  $\mu\text{M}$  of PAFISED for MCF-7 and 75  $\mu\text{M}$  of PFISED for 4T1) for 4 hours with or without pre-treatment of autophagy inhibitor 3-MA by MTT assay. Absorbance was measured using a spectrophotometric plate reader and survivability was calculated considering the control cells have a 100% survivability. The survivability percentages are presented graphically. (C) Immunoblots of LAMP1, LC3 and PAR-1 in the whole cell lysates of MCF7 and MCF10A, treated with HAP (0.5  $\mu\text{g/ml}$  for 30 minutes) and the peptide PAFISED (50  $\mu\text{M}$  for 4 hours).

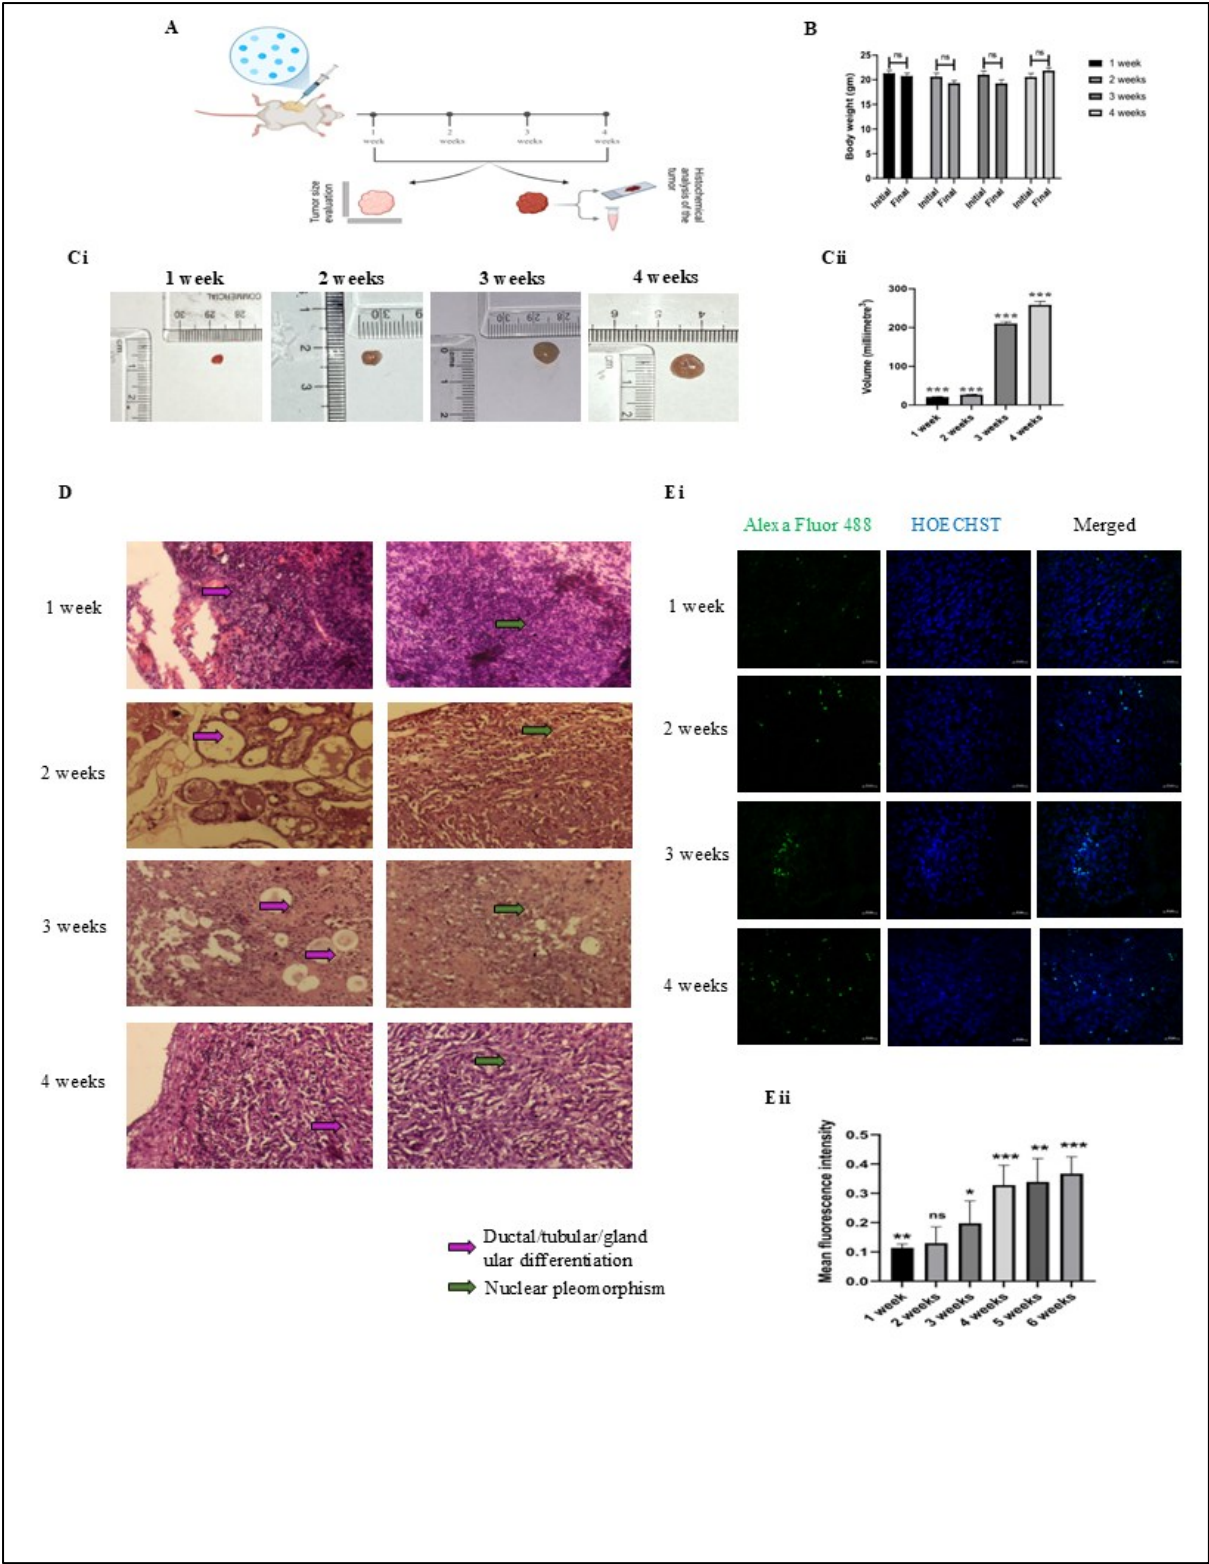

**Figure S4: Gradation of murine breast cancer.** **(A)** Schematic diagram of the outline of the experiments done to determine the grades of breast cancer developed by 4T1 cells in BALB/c mice upto six weeks. **(B)** Graphical presentation of body weights of mice with breast cancer at each week's interval upto 6 weeks starting from the day of injecting 4T1 cells. **(Ci)** Images of breast tumors developed by 4T1 cells in BALB/c mice. **(Cii)** Graphical comparison of the volumes of tumors of different time points. **(D)** Representative histological images of tumors of different time points with H&E staining indicating ductal/ tubular/ glandular differentiation (purple arrow) and nuclear pleomorphism (green arrow). **(Ei)** Representative immunohistochemical images of tumor tissues of different time points stained against Ki-67. **(Eii)** Quantification of mean fluorescence intensity of Ki-67, normalized against nuclear staining with Hoechst 33342.

A

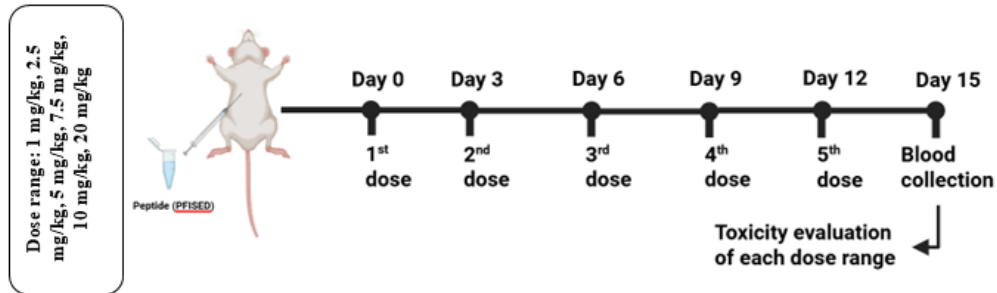

B

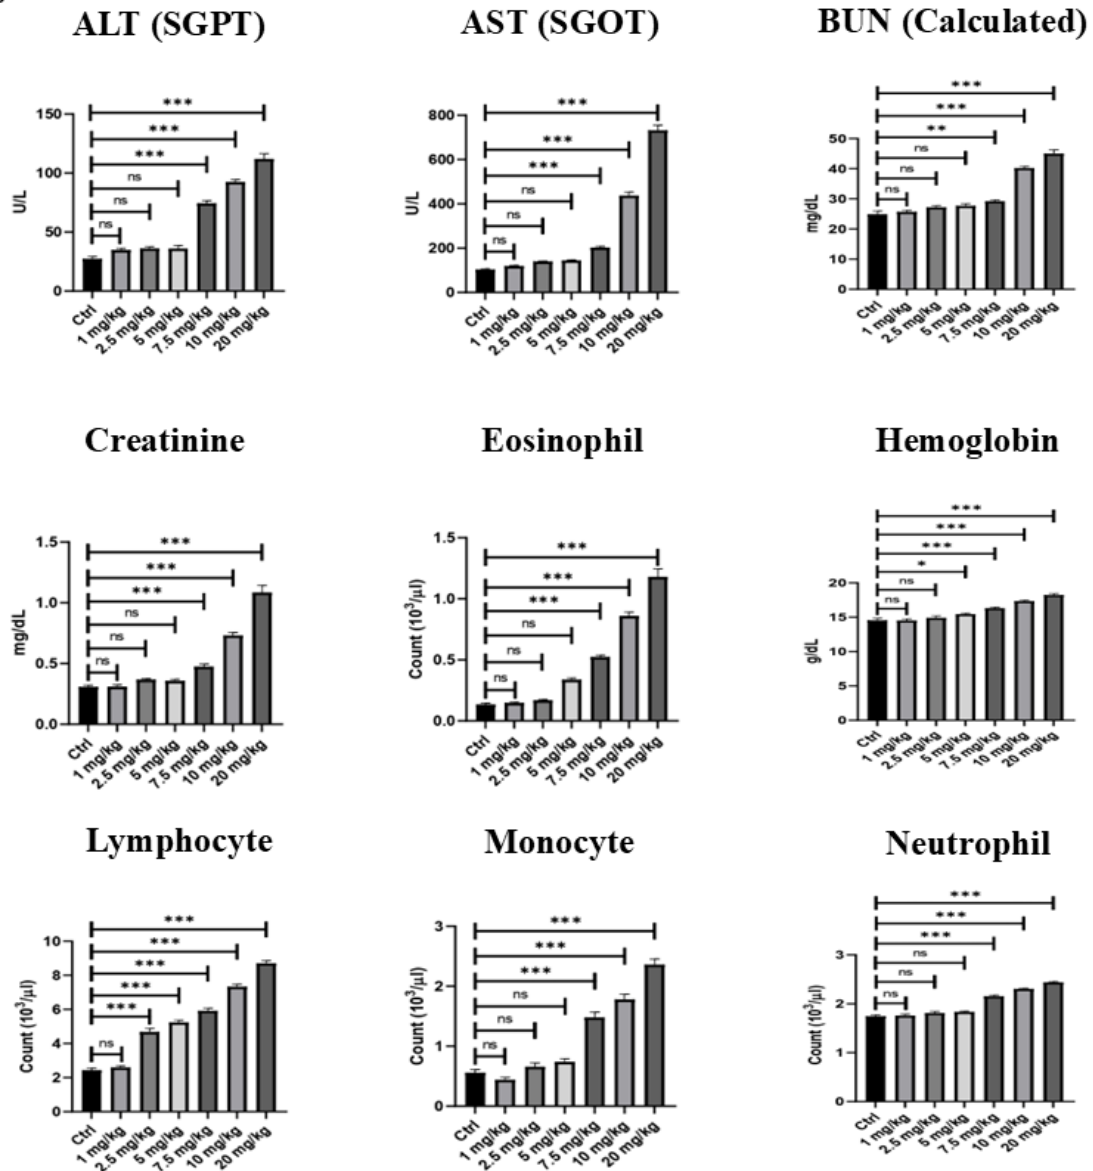

**Figure S5: Optimal peptide dose determination.** (A) Schematic diagram of the design of the experiment for toxicity evaluation of the peptide PFISED in BALB/c mice. (B) Assessment of hepatotoxicity parameters (ALT and AST), nephrotoxicity parameters (creatinine and calculated BUN) and hematological parameters (eosinophil, hemoglobin, lymphocyte, monocyte and neutrophil) in BALB/c mice given peptide of different dosages ranging from 1 mg/kg body weight to 20 mg/kg body weight at an interval of 3 days for 12 days.

**Table S1: The physico-chemical properties of Peptide checked by SwissADME**

| ADMET                        | PAFISED      | PFISED       |
|------------------------------|--------------|--------------|
| Formula                      | C35H51N7O13  | C32H46N6O12  |
| Molecular Weight             | 777.82 g/mol | 706.74 g/mol |
| H-bond Acceptors             | 14           | 13           |
| H-bond Donors                | 11           | 10           |
| Lipinski                     | No           | No           |
| Veber                        | No           | No           |
| Bioavailability              | 0.11         | 0.11         |
| GI Absorption                | Low          | Low          |
| Water Solubility             | Soluble      | Soluble      |
| Synthetic Accessibility      | 6.46         | 5.95         |
| Blood-Brain Barrier Permeant | No           | No           |
| Toxicity                     | No           | No           |

An analysis of the drug-like properties, pharmacokinetics, toxicity, and physicochemical properties of the peptides

**Table S2: The hydrogen bond interactions of top docked pose by CABS-dock**

| Hydrogen Bond | PAFISED                  | PFISED                    |
|---------------|--------------------------|---------------------------|
|               | A:LYS135:NZ - C:ALA2:O   | A:THR1142:OG1 - C:PHE2:O  |
|               | A:TYR1025:OH - C:SER5:OG | A:ASN1144:ND2 - C:SER4:OG |
|               | C:SER5:OG - A:LEU216:O   | A:ASN1144:ND2 - C:SER4:O  |
|               | C:GLU6:N - A:ASP1127:OD2 | A:ASN1144:ND2 - C:ASP6:O  |
|               | A:LYS1135:CE - C:PRO1:O  | A:LYS1147:NZ - C:GLU5:O   |
|               |                          | C:ILE3:N - A:CYS296:SG    |
|               |                          | C:SER4:OG - A:THR1142:O   |
|               |                          | A:ARG1137:CD - C:PHE2:O   |
|               |                          | C:PRO1:CA - C:ASP6:OD1    |
|               |                          | C:SER4:CB - C:ASP6:O      |

The hydrogen bond interactions between receptor residue and peptides of top docked pose by CABS-dock. The interactions were analysed by Biovia Discovery Studio visualizer.

**Table S3: Identification of low-grade breast carcinoma by gradation of tumor**

| Tumor sample | Ductal/tubular/glandular differentiation | Nuclear pleomorphism | Mitotic figure | Cumulative score | Grade of tumor |
|--------------|------------------------------------------|----------------------|----------------|------------------|----------------|
| 1 week       | 2                                        | 1                    | 1              | 4                | I              |
| 2 weeks      | 1                                        | 2                    | 1              | 4                | I              |
| 3 weeks      | 2                                        | 2                    | 1              | 5                | I              |
| 4 weeks      | 3                                        | 2                    | 1              | 6                | II             |

Scoring pattern of the tumors harvested at four different time points. Scores were attributed upon histopathological analysis of the three parameters, *viz.* Ductal/tubular/glandular differentiation, Nuclear pleomorphism and Mitotic figure and gradation of tumors based on their cumulative scores according to Nottingham Grading System.
